# Supplementary material
Source: PubMed Central journal article supplement (PMC9880869)
Supplement: jamaoncol-e226911-s002.pdf [file jamaoncol-e226911-s002.pdf]

## Supplementary Online Content

Cheng E, Shi Q, Shields AF, et al. Association of inflammatory biomarkers with survival among patients with stage III colon cancer. *JAMA Oncol*. Published online January 26, 2023. doi:10.1001/jamaoncol.2022.6911

**eTable 1.** Comparison of Demographic and Clinical Factors Between Patients Included in vs Excluded From the Biomarker Cohort

**eTable 2.** Demographic and Clinical Characteristics of Colon Cancer Patients by Quintiles of Inflammatory Biomarkers

**eTable 3.** Five-Year Survival From the Kaplan-Meier Estimator by Quintiles of Inflammatory Biomarkers

**eFigure 1.** Kaplan-Meier Estimates for Recurrence-Free Survival by Quintiles of Inflammatory Biomarkers Among Patients With Stage III Colon Cancer

**eFigure 2.** Kaplan-Meier Estimates for Overall Survival by Quintiles of Inflammatory Biomarkers Among Patients With Stage III Colon Cancer

**eTable 4.** Unadjusted Associations of Inflammatory Biomarkers With Survival Among Patients With Stage III Colon Cancer

**eTable 5.** Sensitivity Analysis of Incorporating Diet and Lifestyle Factors for Adjusted Associations of Inflammatory Biomarkers With Survival Among Patients With Stage III Colon Cancer

This supplementary material has been provided by the authors to give readers additional information about their work.

**eTable 1.** Comparison of Demographic and Clinical Factors Between Patients Included in vs Excluded From the Biomarker Cohort

| Characteristics <sup>a</sup>                | Included<br>(N = 1,494) | Excluded<br>(N = 1,032) |
|---------------------------------------------|-------------------------|-------------------------|
| Age (years)                                 | 61.3 (54.0-68.8)        | 61.4 (53.1-68.6)        |
| Sex                                         |                         |                         |
| Male                                        | 828 (55.4)              | 564 (54.7)              |
| Female                                      | 666 (44.6)              | 468 (45.3)              |
| Race <sup>b</sup>                           |                         |                         |
| Asian                                       | 52 (3.5)                | 55 (5.3)                |
| Black                                       | 163 (10.9)              | 156 (15.1)              |
| Others                                      | 49 (3.3)                | 52 (5.0)                |
| White                                       | 1,230 (82.3)            | 769 (74.5)              |
| Ethnicity                                   |                         |                         |
| Hispanic                                    | 82 (5.5)                | 109 (10.6)              |
| Non-Hispanic                                | 1,412 (94.5)            | 923 (89.4)              |
| ECOG performance status <sup>c</sup>        |                         |                         |
| 0                                           | 1,076 (72.0)            | 721 (69.9)              |
| 1-2                                         | 418 (28.0)              | 311 (30.1)              |
| Bowel wall invasion by T stage <sup>d</sup> |                         |                         |
| T1-T2                                       | 290 (19.6)              | 158 (15.6)              |
| T3                                          | 984 (66.4)              | 690 (68.1)              |
| T4                                          | 209 (14.1)              | 166 (16.4)              |
| Missing                                     | 11                      | 18                      |
| Nodal stage <sup>e</sup>                    |                         |                         |
| N1                                          | 1,090 (73.5)            | 750 (74.0)              |
| N2                                          | 392 (26.5)              | 263 (26.0)              |
| Missing                                     | 12                      | 19                      |
| Tumor location                              |                         |                         |
| Left-sided                                  | 716 (48.5)              | 456 (44.66)             |
| Right-sided                                 | 754 (51.0)              | 561 (54.95)             |

|                          |                  |                  |
|--------------------------|------------------|------------------|
| Multiple                 | 7 (0.5)          | 4 (0.39)         |
| Missing                  | 17               | 11               |
| BMI (kg/m <sup>2</sup> ) | 28.0 (24.6-32.2) | 27.8 (24.2-31.6) |

Abbreviations: BMI, body mass index; ECOG, Eastern Cooperative Oncology Group.

<sup>a</sup> Continuous variables were presented as median (interquartile), and categorical variables as number (percentage). Percentages may not add up to 100% because of rounding.

<sup>b</sup> Participants who did not self-identify as Asian, Black or White were classified as others for race.

<sup>c</sup> ECOG performance status: 0, fully active, able to carry on all predisease performance without restriction; 1, restricted in physically strenuous activity but ambulatory and able to carry out light work; 2, ambulatory and capable of all self-care but unable to carry out any work activities, up and about more than 50% of waking hours.

<sup>d</sup> Bowel wall invasion: T1, tumor has grown into the submucosa; T2, growth into the muscularis propria; T3, grown through the muscularis propria and into the subserosa; and T4, grown into the surface of the visceral peritoneum or into or has attached to other organs or structures.

<sup>e</sup> Nodal stage: N1, 1 to 3 lymph nodes tested positive for cancer; N2, 4 or more positive lymph nodes.

**eTable 2.** Demographic and Clinical Characteristics of Colon Cancer Patients by Quintiles of Inflammatory Biomarkers

|                                             | IL-6             |                  |                  |                  |                  |         |
|---------------------------------------------|------------------|------------------|------------------|------------------|------------------|---------|
| Characteristics <sup>a</sup>                | Q1 (N = 298)     | Q2 (N = 300)     | Q3 (N = 300)     | Q4 (N = 299)     | Q5 (N = 297)     | P-value |
| Age (years)                                 | 58.7 (50.7-66.7) | 60.2 (53.2-68.0) | 60.9 (53.9-68.0) | 64.5 (56.5-70.9) | 63.7 (55.8-70.6) | <0.001  |
| Sex                                         |                  |                  |                  |                  |                  | 0.27    |
| Male                                        | 149 (50.0)       | 176 (58.7)       | 169 (56.3)       | 170 (56.9)       | 164 (55.2)       |         |
| Female                                      | 149 (50.0)       | 124 (41.3)       | 131 (43.7)       | 129 (43.1)       | 133 (44.8)       |         |
| Race <sup>b</sup>                           |                  |                  |                  |                  |                  | 0.07    |
| Asian                                       | 19 (6.4)         | 11 (3.7)         | 12 (4.0)         | 5 (1.7)          | 5 (1.7)          |         |
| Black                                       | 24 (8.1)         | 30 (10.0)        | 35 (11.7)        | 37 (12.4)        | 37 (12.5)        |         |
| Others                                      | 9 (3.0)          | 14 (4.7)         | 8 (2.7)          | 11 (3.7)         | 7 (2.4)          |         |
| White                                       | 246 (82.6)       | 245 (81.7)       | 245 (81.7)       | 246 (82.3)       | 248 (83.5)       |         |
| Ethnicity                                   |                  |                  |                  |                  |                  | 0.02    |
| Hispanic                                    | 19 (6.4)         | 27 (9.0)         | 12 (4.0)         | 12 (4.0)         | 12 (4.0)         |         |
| Non-Hispanic                                | 279 (93.6)       | 273 (91.0)       | 288 (96.0)       | 287 (96.0)       | 285 (96.0)       |         |
| ECOG performance status <sup>c</sup>        |                  |                  |                  |                  |                  | <0.001  |
| 0                                           | 231 (77.5)       | 231 (77.0)       | 215 (71.7)       | 211 (70.6)       | 188 (63.3)       |         |
| 1-2                                         | 67 (22.5)        | 69 (23.0)        | 85 (28.3)        | 88 (29.4)        | 109 (36.7)       |         |
| Bowel wall invasion by T stage <sup>d</sup> |                  |                  |                  |                  |                  | 0.24    |
| T1-T2                                       | 68 (23.1)        | 59 (19.7)        | 56 (18.7)        | 53 (17.9)        | 54 (18.5)        |         |
| T3                                          | 196 (66.4)       | 201 (67.2)       | 193 (64.3)       | 206 (69.4)       | 188 (64.4)       |         |
| T4                                          | 31 (10.5)        | 39 (13.0)        | 51 (17.0)        | 38 (12.8)        | 50 (17.1)        |         |
| Missing                                     | 3                | 1                | 0                | 2                | 5                |         |
| Nodal stage <sup>e</sup>                    |                  |                  |                  |                  |                  | 0.17    |
| N1                                          | 218 (74.1)       | 224 (74.9)       | 233 (77.7)       | 205 (69.0)       | 210 (71.9)       |         |
| N2                                          | 76 (25.9)        | 75 (25.1)        | 67 (22.3)        | 92 (31.0)        | 82 (28.1)        |         |
| Missing                                     | 4                | 1                | 0                | 2                | 5                |         |
| Tumor location <sup>f</sup>                 |                  |                  |                  |                  |                  | 0.06    |
| Left-sided                                  | 158 (53.7)       | 153 (52.0)       | 139 (46.5)       | 138 (46.5)       | 128 (43.7)       |         |
| Right-sided                                 | 136 (46.3)       | 138 (46.9)       | 160 (53.5)       | 156 (52.5)       | 164 (56.0)       |         |

|                                                                 |                  |                  |                  |                  |                  |         |
|-----------------------------------------------------------------|------------------|------------------|------------------|------------------|------------------|---------|
| Multiple                                                        | 0 (0)            | 3 (1.0)          | 0 (0)            | 3 (1.0)          | 1 (0.3)          |         |
| Missing                                                         | 4                | 6                | 1                | 2                | 4                |         |
| BMI (kg/m <sup>2</sup> )                                        | 26.0 (23.0-28.8) | 27.2 (24.2-30.8) | 28.6 (25.1-32.6) | 29.4 (25.5-34.0) | 30.2 (36.0-36.1) | <0.001  |
| Time between surgery and blood collection <sup>g</sup> (months) | 1.5 (1.2-1.8)    | 1.6 (1.3-1.9)    | 1.6 (1.3-1.9)    | 1.6 (1.3-1.9)    | 1.5 (1.2-1.8)    | 0.34    |
| Blood sample storage time (months)                              | 58.5 (44.7-73.0) | 59.4 (44.9-70.9) | 57.2 (44.1-69.6) | 56.7 (44.5-71.4) | 56.9 (43.8-70.5) | 0.94    |
|                                                                 |                  |                  |                  |                  |                  |         |
|                                                                 |                  |                  | sTNF-αR2         |                  |                  |         |
|                                                                 | Q1 (N = 297)     | Q2 (N = 299)     | Q3 (N = 300)     | Q4 (N = 299)     | Q5 (N = 299)     | P-value |
| Age (years)                                                     | 56.0 (50.5-62.3) | 58.7 (52.2-66.2) | 60.9 (54.2-68.1) | 64.5 (57.1-70.8) | 66.9 (59.7-73.6) | <0.001  |
| Sex                                                             |                  |                  |                  |                  |                  | 0.85    |
| Male                                                            | 157 (52.9)       | 166 (55.5)       | 171 (57.0)       | 164 (54.8)       | 170 (56.9)       |         |
| Female                                                          | 140 (47.1)       | 133 (44.5)       | 129 (43.0)       | 135 (45.2)       | 129 (43.1)       |         |
| Race <sup>b</sup>                                               |                  |                  |                  |                  |                  | <0.001  |
| Asian                                                           | 22 (7.4)         | 10 (3.3)         | 10 (3.3)         | 6 (2.0)          | 4 (1.3)          |         |
| Black                                                           | 39 (13.1)        | 36 (12.0)        | 34 (11.3)        | 29 (9.7)         | 25 (8.4)         |         |
| Others                                                          | 17 (5.7)         | 8 (2.7)          | 11 (3.7)         | 9 (3.0)          | 4 (1.3)          |         |
| White                                                           | 219 (73.7)       | 245 (81.9)       | 245 (81.7)       | 255 (85.3)       | 266 (89.0)       |         |
| Ethnicity                                                       |                  |                  |                  |                  |                  | 0.002   |
| Hispanic                                                        | 27 (9.1)         | 14 (4.7)         | 17 (5.7)         | 19 (6.4)         | 5 (1.7)          |         |
| Non-Hispanic                                                    | 270 (90.9)       | 285 (95.3)       | 283 (94.3)       | 280 (93.6)       | 294 (98.3)       |         |
| ECOG performance status <sup>c</sup>                            |                  |                  |                  |                  |                  | <0.001  |
| 0                                                               | 237 (79.8)       | 241 (80.6)       | 222 (74.0)       | 202 (67.6)       | 174 (58.2)       |         |
| 1-2                                                             | 60 (20.2)        | 58 (19.4)        | 78 (26.0)        | 97 (32.4)        | 125 (41.8)       |         |
| Bowel wall invasion by T stage <sup>d</sup>                     |                  |                  |                  |                  |                  | <0.001  |
| T1-T2                                                           | 73 (24.8)        | 67 (22.6)        | 61 (20.5)        | 50 (16.9)        | 39 (13.1)        |         |
| T3                                                              | 199 (67.5)       | 183 (61.6)       | 197 (66.3)       | 197 (66.6)       | 209 (69.8)       |         |
| T4                                                              | 23 (7.8)         | 47 (15.8)        | 39 (13.1)        | 49 (16.6)        | 51 (17.1)        |         |
| Missing                                                         | 2                | 2                | 3                | 3                | 1                |         |
| Nodal stage <sup>e</sup>                                        |                  |                  |                  |                  |                  | 0.88    |
| N1                                                              | 220 (74.1)       | 216 (72.2)       | 227 (75.7)       | 222 (74.2)       | 217 (72.6)       |         |

|                                                                 |                  |                  |                  |                  |                  |                 |
|-----------------------------------------------------------------|------------------|------------------|------------------|------------------|------------------|-----------------|
| N2                                                              | 77 (25.9)        | 83 (27.8)        | 73 (24.3)        | 77 (25.8)        | 82 (27.4)        |                 |
| Missing                                                         | 3                | 2                | 3                | 3                | 1                |                 |
| Tumor location <sup>f</sup>                                     |                  |                  |                  |                  |                  | 0.001           |
| Left-sided                                                      | 166 (56.5)       | 152 (51.0)       | 144 (48.8)       | 142 (48.1)       | 112 (38.0)       |                 |
| Right-sided                                                     | 128 (43.5)       | 146 (49.0)       | 149 (50.5)       | 150 (50.9)       | 181 (61.4)       |                 |
| Multiple                                                        | 0 (0)            | 0 (0)            | 2 (0.7)          | 3 (1.0)          | 2 (0.7)          |                 |
| Missing                                                         | 3                | 1                | 5                | 4                | 4                |                 |
| BMI (kg/m <sup>2</sup> )                                        | 26.4 (23.3-29.6) | 28.1 (24.1-31.7) | 27.8 (24.8-31.9) | 28.7 (25.1-33.1) | 29.3 (25.7-36.4) | <0.001          |
| Time between surgery and blood collection <sup>g</sup> (months) | 1.6 (1.3-1.9)    | 1.5 (1.2-1.8)    | 1.6 (1.3-2.0)    | 1.6 (1.2-1.8)    | 1.5 (1.2-1.9)    | 0.07            |
| Blood sample storage time (months)                              | 57.5 (42.7-69.4) | 58.5 (43.6-69.7) | 55.3 (44.4-70.6) | 59.7 (48.0-72.6) | 57.4 (47.4-72.4) | 0.16            |
|                                                                 |                  |                  | hsCRP            |                  |                  |                 |
|                                                                 | Q1 (N = 300)     | Q2 (N = 299)     | Q3 (N = 299)     | Q4 (N = 299)     | Q5 (N = 297)     | <i>P</i> -value |
| Age (years)                                                     | 60.4 (53.6-68.6) | 62.5 (54.6-70.0) | 61.5 (54.3-68.7) | 61.4 (53.9-68.3) | 60.6 (53.9-68.4) | 0.45            |
| Sex                                                             |                  |                  |                  |                  |                  | 0.09            |
| Male                                                            | 162 (54.0)       | 176 (58.9)       | 178 (59.5)       | 165 (55.2)       | 147 (49.5)       |                 |
| Female                                                          | 138 (46.0)       | 123 (41.1)       | 121 (40.5)       | 134 (44.8)       | 150 (50.5)       |                 |
| Race <sup>b</sup>                                               |                  |                  |                  |                  |                  | <0.001          |
| Asian                                                           | 22 (7.3)         | 8 (2.7)          | 9 (3.0)          | 6 (2.0)          | 7 (2.4)          |                 |
| Black                                                           | 20 (6.7)         | 26 (8.7)         | 36 (12.0)        | 35 (11.7)        | 46 (15.5)        |                 |
| Others                                                          | 14 (4.7)         | 6 (2.0)          | 13 (4.4)         | 9 (3.0)          | 7 (2.4)          |                 |
| White                                                           | 244 (81.3)       | 259 (86.6)       | 241 (80.6)       | 249 (83.3)       | 237 (79.8)       |                 |
| Ethnicity                                                       |                  |                  |                  |                  |                  | 0.92            |
| Hispanic                                                        | 17 (5.7)         | 17 (5.7)         | 18 (6.0)         | 17 (5.7)         | 13 (4.4)         |                 |
| Non-Hispanic                                                    | 283 (94.3)       | 282 (94.3)       | 281 (94.0)       | 282 (94.3)       | 284 (95.6)       |                 |
| ECOG performance status <sup>c</sup>                            |                  |                  |                  |                  |                  | 0.01            |
| 0                                                               | 232 (77.3)       | 225 (75.3)       | 217 (72.5)       | 206 (68.9)       | 196 (66.0)       |                 |
| 1-2                                                             | 68 (22.7)        | 74 (24.7)        | 82 (27.4)        | 93 (31.1)        | 101 (34.0)       |                 |
| Bowel wall invasion by T stage <sup>d</sup>                     |                  |                  |                  |                  |                  | 0.22            |
| T1-T2                                                           | 63 (21.1)        | 60 (20.2)        | 69 (23.2)        | 48 (16.1)        | 50 (17.1)        |                 |

|                                                                 |                  |                  |                  |                  |                  |        |
|-----------------------------------------------------------------|------------------|------------------|------------------|------------------|------------------|--------|
| T3                                                              | 186 (62.4)       | 201 (67.7)       | 185 (62.3)       | 206 (68.9)       | 206 (70.6)       |        |
| T4                                                              | 49 (16.4)        | 36 (12.1)        | 43 (14.5)        | 45 (15.1)        | 36 (12.3)        |        |
| Missing                                                         | 2                | 2                | 2                | 0                | 5                |        |
| Nodal stage <sup>e</sup>                                        |                  |                  |                  |                  |                  | 0.27   |
| N1                                                              | 230 (77.4)       | 220 (74.1)       | 207 (69.7)       | 215 (71.9)       | 218 (74.7)       |        |
| N2                                                              | 67 (22.6)        | 77 (25.9)        | 90 (30.3)        | 84 (28.1)        | 74 (25.3)        |        |
| Missing                                                         | 3                | 2                | 2                | 0                | 5                |        |
| Tumor location <sup>f</sup>                                     |                  |                  |                  |                  |                  | 0.08   |
| Left-sided                                                      | 162 (54.9)       | 150 (50.7)       | 144 (48.16)      | 131 (44.0)       | 129 (43.9)       |        |
| Right-sided                                                     | 132 (45.8)       | 145 (49.0)       | 148 (50.3)       | 164 (55.0)       | 165 (56.1)       |        |
| Multiple                                                        | 1 (0.3)          | 1 (0.3)          | 2 (0.7)          | 3 (1.0)          | 0 (0)            |        |
| Missing                                                         | 5                | 3                | 5                | 1                | 3                |        |
| BMI (kg/m <sup>2</sup> )                                        | 25.7 (22.4-28.9) | 27.0 (23.5-29.8) | 28.0 (25.3-32.0) | 29.3 (26.0-34.4) | 30.8 (26.3-36.7) | <0.001 |
| Time between surgery and blood collection <sup>g</sup> (months) | 1.6 (1.3-1.9)    | 1.6 (1.3-1.9)    | 1.5 (1.3-1.9)    | 1.6 (1.3-1.9)    | 1.5 (1.2-1.8)    | 0.29   |
| Blood sample storage time (months)                              | 59.3 (44.5-71.0) | 57.2 (46.1-68.4) | 57.1 (44.7-71.4) | 55.5 (42.9-73.3) | 58.2 (44.7-72.6) | 0.94   |

Abbreviations: BMI, body mass index; ECOG, Eastern Cooperative Oncology Group; Q1, quintile 1; Q2, quintile 2; Q3, quintile 3; Q4, quintile 4; Q5, quintile 5.

<sup>a</sup> Continuous variables were presented as median (interquartile), and categorical variables as number (percentage). Percentages may not add up to 100% because of rounding.

<sup>b</sup> Participants who did not self-identify as Asian, Black, or White were classified as others for race.

<sup>c</sup> ECOG performance status: 0, fully active, able to carry on all predisease performance without restriction; 1, restricted in physically strenuous activity but ambulatory and able to carry out light work; 2, ambulatory and capable of all self-care but unable to carry out any work activities, up and about more than 50% of waking hours.

<sup>d</sup> Bowel wall invasion: T1, tumor has grown into the submucosa; T2, growth into the muscularis propria; T3, grown through the muscularis propria and into the subserosa; and T4, grown into the surface of the visceral peritoneum or into or has attached to other organs or structures.

<sup>e</sup> Nodal stage: N1, 1 to 3 lymph nodes tested positive for cancer; N2, 4 or more positive lymph nodes.

<sup>f</sup> Given small sample size for tumor located at multiple sites, chi-squared tests were performed for left- vs. right-sided.

<sup>g</sup> Number of missing for time between surgery and blood collection: 13

**eTable 3.** Five-Year Survival From the Kaplan-Meier Estimator by Quintiles of Inflammatory Biomarkers

| Disease-free Survival, % (95% CI) |                  |                   |                  |
|-----------------------------------|------------------|-------------------|------------------|
| Quintiles                         | IL-6             | sTNF- $\alpha$ R2 | hsCRP            |
| Q1                                | 79.2 (73.6-83.7) | 80.5 (75.2-84.9)  | 79.5 (74.2-83.9) |
| Q2                                | 76.1 (70.5-80.8) | 73.5 (67.6-78.6)  | 73.2 (67.3-78.2) |
| Q3                                | 70.0 (64.0-75.3) | 72.0 (66.0-77.1)  | 67.4 (61.2-72.8) |
| Q4                                | 67.0 (60.7-72.6) | 69.6 (63.4-75.0)  | 71.9 (65.7-77.1) |
| Q5                                | 65.9 (59.4-71.6) | 62.9 (56.5-68.6)  | 66.6 (60.1-72.2) |
| Recurrence-free Survival          |                  |                   |                  |
| Quintiles                         | IL-6             | sTNF- $\alpha$ R2 | hsCRP            |
| Q1                                | 81.3 (75.8-85.7) | 92.8 (88.9-95.3)  | 89.9 (85.6-93.0) |
| Q2                                | 77.0 (71.4-81.6) | 86.2 (81.4-89.8)  | 87.8 (83.2-91.2) |
| Q3                                | 74.5 (68.7-79.4) | 85.2 (80.3-89.0)  | 81.0 (75.7-85.2) |
| Q4                                | 71.3 (65.2-76.6) | 83.6 (78.5-87.5)  | 84.5 (79.5-88.3) |
| Q5                                | 70.3 (63.9-75.9) | 76.0 (70.4-80.7)  | 80.6 (75.3-84.9) |
| Overall Survival                  |                  |                   |                  |
| Quintiles                         | IL-6             | sTNF- $\alpha$ R2 | hsCRP            |
| Q1                                | 81.3 (75.8-85.7) | 80.8 (75.4-85.1)  | 81.0 (75.7-85.3) |
| Q2                                | 77.0 (71.4-81.6) | 75.8 (70.0-80.6)  | 76.5 (70.7-81.2) |
| Q3                                | 74.5 (68.7-79.4) | 75.8 (70.0-80.7)  | 70.2 (64.1-75.4) |
| Q4                                | 71.3 (65.2-76.6) | 72.6 (66.5-77.8)  | 75.6 (69.6-80.5) |
| Q5                                | 70.3 (63.9-75.9) | 69.3 (63.0-74.8)  | 71.5 (65.1-76.8) |

Abbreviations: Q1, quintile 1; Q2, quintile 2; Q3, quintile 3; Q4, quintile 4; Q5, quintile 5.



**eFigure 1.** Kaplan-Meier Estimates for Recurrence-Free Survival by Quintiles of Inflammatory Biomarkers Among Patients With Stage III Colon Cancer

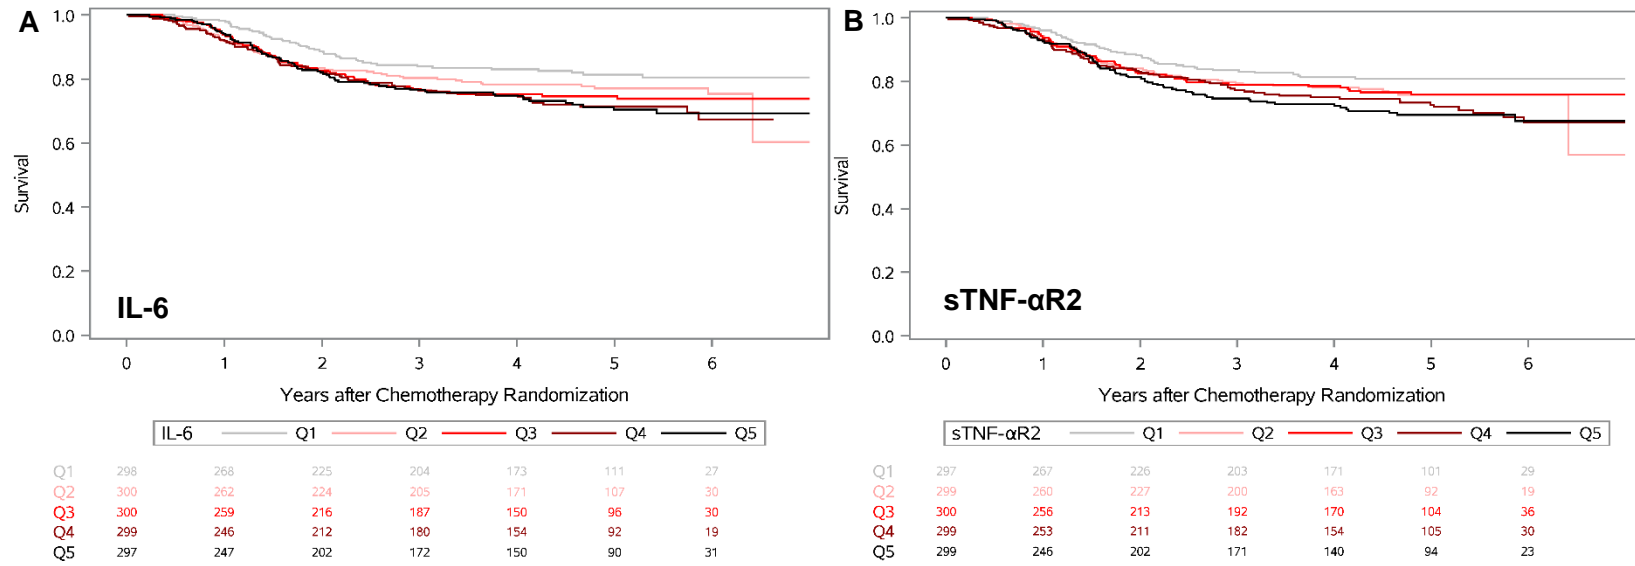

**C**

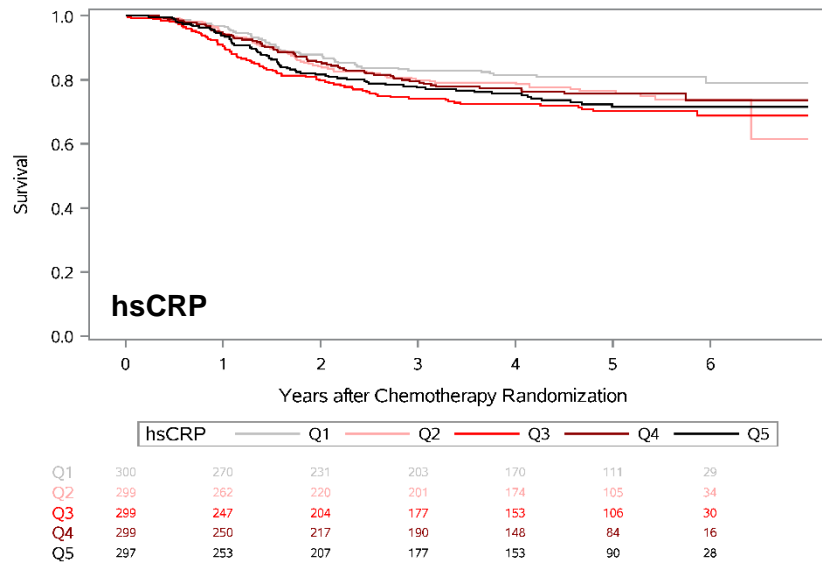

Abbreviations: Q1, quintile 1; Q2, quintile 2; Q3, quintile 3; Q4, quintile 4; Q5, quintile 5.

Recurrence-free survival by quintiles of IL-6 (eFigure 1A), sTNF- $\alpha$ R2 (eFigure 1B), hsCRP (eFigure 1C). *P*-values for each inflammatory biomarker were calculated using the log-rank test: IL-6 (*P*-value = 0.05), sTNF- $\alpha$ R2 (*P*-value = 0.04), and hsCRP (*P*-value = 0.06).

**eFigure 2.** Kaplan-Meier Estimates for Overall Survival by Quintiles of Inflammatory Biomarkers Among Patients With Stage III Colon Cancer

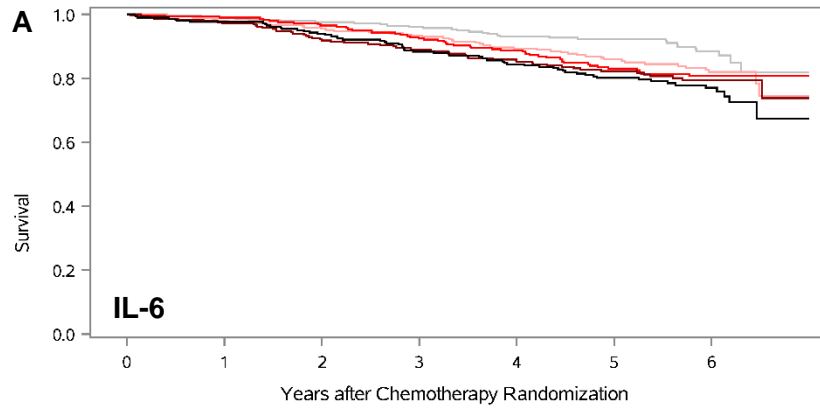

| IL-6 | Q1 | Q2 | Q3 | Q4 | Q5 |
|------|----|----|----|----|----|
|------|----|----|----|----|----|

|    |     |     |     |     |     |     |     |
|----|-----|-----|-----|-----|-----|-----|-----|
| Q1 | 298 | 286 | 269 | 259 | 243 | 189 | 99  |
| Q2 | 300 | 285 | 266 | 256 | 241 | 183 | 108 |
| Q3 | 300 | 282 | 268 | 250 | 234 | 176 | 94  |
| Q4 | 299 | 273 | 252 | 238 | 227 | 175 | 97  |
| Q5 | 297 | 274 | 253 | 230 | 215 | 164 | 98  |

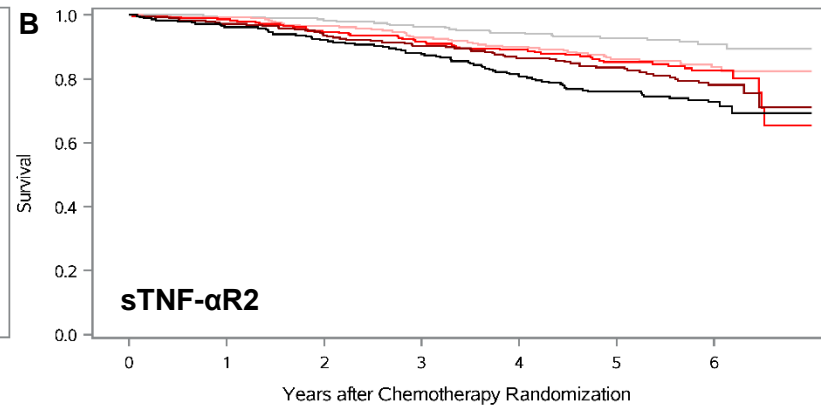

| sTNF- $\alpha$ R2 | Q1 | Q2 | Q3 | Q4 | Q5 |
|-------------------|----|----|----|----|----|
|-------------------|----|----|----|----|----|

|    |     |     |     |     |     |     |     |
|----|-----|-----|-----|-----|-----|-----|-----|
| Q1 | 297 | 289 | 270 | 253 | 243 | 184 | 109 |
| Q2 | 299 | 284 | 271 | 256 | 242 | 179 | 102 |
| Q3 | 300 | 280 | 260 | 247 | 233 | 177 | 91  |
| Q4 | 299 | 279 | 257 | 240 | 224 | 177 | 100 |
| Q5 | 299 | 268 | 250 | 237 | 218 | 170 | 94  |

**C**

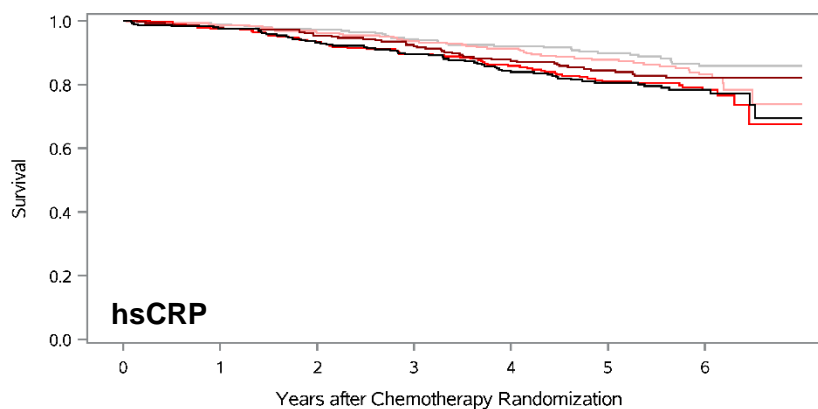

| hsCRP | Q1  | Q2  | Q3  | Q4  | Q5  |     |     |
|-------|-----|-----|-----|-----|-----|-----|-----|
| Q1    | 300 | 287 | 271 | 255 | 240 | 186 | 107 |
| Q2    | 299 | 284 | 265 | 253 | 243 | 196 | 112 |
| Q3    | 299 | 278 | 257 | 240 | 228 | 178 | 90  |
| Q4    | 299 | 277 | 260 | 244 | 227 | 164 | 87  |
| Q5    | 297 | 274 | 255 | 241 | 222 | 163 | 100 |

Abbreviations: Q1, quintile 1; Q2, quintile 2; Q3, quintile 3; Q4, quintile 4; Q5, quintile 5.

Overall survival by quintiles of IL-6 (eFigure 2A), sTNF- $\alpha$ R2 (eFigure 2B), hsCRP (eFigure 2C). *P*-values for each inflammatory biomarker were calculated using the log-rank test: IL-6 (*P*-value = 0.008), sTNF- $\alpha$ R2 (*P*-value <0.001), and hsCRP (*P*-value = 0.02).

**eTable 4.** Unadjusted Associations of Inflammatory Biomarkers With Survival Among Patients With Stage III Colon Cancer

| Survival                 | Q1   | Q2               | Q3               | Q4               | Q5               | <i>P</i> for Trend |
|--------------------------|------|------------------|------------------|------------------|------------------|--------------------|
| Disease-free Survival    |      |                  |                  |                  |                  |                    |
| IL-6                     | 1.00 | 1.16 (0.82-1.65) | 1.42 (1.01-1.99) | 1.65 (1.19-2.30) | 1.70 (1.22-2.36) | <0.001             |
| sTNF- $\alpha$ R2        | 1.00 | 1.39 (0.97-1.98) | 1.50 (1.05-2.13) | 1.75 (1.24-2.47) | 2.10 (1.50-2.94) | <0.001             |
| hsCRP                    | 1.00 | 1.39 (0.99-1.95) | 1.69 (1.21-2.36) | 1.38 (0.98-1.95) | 1.64 (1.18-2.30) | 0.003              |
| Recurrence-free Survival |      |                  |                  |                  |                  |                    |
| IL-6                     | 1.00 | 1.32 (0.91-1.92) | 1.47 (1.02-2.12) | 1.65 (1.15-2.37) | 1.62 (1.13-2.33) | 0.02               |
| sTNF- $\alpha$ R2        | 1.00 | 1.30 (0.90-1.89) | 1.30 (0.90-1.89) | 1.57 (1.10-2.25) | 1.68 (1.18-2.40) | 0.006              |
| hsCRP                    | 1.00 | 1.29 (0.90-1.87) | 1.68 (1.18-2.39) | 1.30 (0.90-1.89) | 1.48 (1.03-2.12) | 0.03               |
| Overall survival         |      |                  |                  |                  |                  |                    |
| IL-6                     | 1.00 | 1.53 (0.97-2.40) | 1.65 (1.06-2.59) | 1.90 (1.22-2.94) | 2.16 (1.40-3.33) | <0.001             |
| sTNF- $\alpha$ R2        | 1.00 | 1.86 (1.12-3.09) | 2.20 (1.34-3.62) | 2.59 (1.60-4.21) | 3.49 (2.18-5.57) | <0.001             |
| hsCRP                    | 1.00 | 1.34 (0.86-2.10) | 1.88 (1.23-2.86) | 1.43 (0.92-2.24) | 1.86 (1.22-2.84) | <0.001             |

Abbreviations: Q1, quintile 1; Q2, quintile 2; Q3, quintile 3; Q4, quintile 4; Q5, quintile 5.

**eTable 5.** Sensitivity Analysis of Incorporating Diet and Lifestyle Factors for Adjusted Associations of Inflammatory Biomarkers With Survival Among Patients With Stage III Colon Cancer

| Survival                 | Q1   | Q2               | Q3               | Q4               | Q5               | <i>P</i> for Trend |
|--------------------------|------|------------------|------------------|------------------|------------------|--------------------|
| Disease-free Survival    |      |                  |                  |                  |                  |                    |
| IL-6                     | 1.00 | 1.06 (0.75-1.52) | 1.33 (0.94-1.89) | 1.40 (0.99-1.99) | 1.42 (1.00-2.01) | 0.04               |
| sTNF- $\alpha$ R2        | 1.00 | 1.18 (0.82-1.70) | 1.37 (0.95-1.97) | 1.54 (1.07-2.22) | 1.67 (1.15-2.42) | 0.003              |
| hsCRP                    | 1.00 | 1.29 (0.91-1.83) | 1.59 (1.13-2.24) | 1.22 (0.85-1.75) | 1.56 (1.10-2.22) | 0.02               |
| Recurrence-free Survival |      |                  |                  |                  |                  |                    |
| IL-6                     | 1.00 | 1.25 (0.86-1.84) | 1.44 (0.99-2.11) | 1.51 (1.03-2.22) | 1.45 (0.99-2.14) | 0.14               |
| sTNF- $\alpha$ R2        | 1.00 | 1.11 (0.76-1.62) | 1.23 (0.84-1.80) | 1.45 (0.99-2.13) | 1.45 (0.98-2.16) | 0.07               |
| hsCRP                    | 1.00 | 1.23 (0.85-1.79) | 1.61 (1.11-2.32) | 1.18 (0.80-1.74) | 1.49 (1.02-2.17) | 0.06               |
| Overall Survival         |      |                  |                  |                  |                  |                    |
| IL-6                     | 1.00 | 1.37 (0.86-2.18) | 1.58 (0.99-2.51) | 1.45 (0.91-2.31) | 1.63 (1.03-2.59) | 0.04               |
| sTNF- $\alpha$ R2        | 1.00 | 1.53 (0.91-2.57) | 1.84 (1.10-3.06) | 1.91 (1.14-3.20) | 2.22 (1.33-3.72) | 0.004              |
| hsCRP                    | 1.00 | 1.25 (0.79-1.96) | 1.71 (1.10-2.64) | 1.17 (0.74-1.86) | 1.64 (1.05-2.56) | 0.007              |

Abbreviations: Q1, quintile 1; Q2, quintile 2; Q3, quintile 3; Q4, quintile 4; Q5, quintile 5.

<sup>a</sup> Adjusted for age (years), sex (male or female), race (White, Black, Asian, Others), ethnicity (Hispanic or Non-Hispanic), ECOG performance status (0 or 1-2), T stage (T1-T2, T3, T4), N stage (N or N2), tumor location (left-sided, right-sided, multiple), BMI (kg/m<sup>2</sup>; <18.5, 18.5-24.9, 25.0-29.9, 30+), time between surgery and blood draw (months), blood sample storage time (months), diet quality (measured by Western dietary pattern score), smoking (never, past, current), low dose aspirin usage (yes or no), physical activity (metabolic equivalent task hours per week [MET-hours/week]; 0-2.9, 3-8.9, 9-17.9, 18+), and treatment arm (celecoxib or placebo).
