# Supplementary material
Source: PubMed Central journal article supplement (PMC9880869)
Supplement: jamaoncol-e226911-s003.pdf [file jamaoncol-e226911-s003.pdf]

## **Data Sharing Statement**

Cheng. Association of Inflammatory Biomarkers With Survival Among Patients With Stage III Colon Cancer. *JAMA Oncol*. Published January 26, 2023. doi:10.1001/jamaoncol.2022.6911

### **Data**

**Data available:** No
